# Supplementary material
Source: PubMed Central journal article supplement (PMC6748128)
Supplement: 41418_2018_263_MOESM1_ESM.pdf [file 41418_2018_263_MOESM1_ESM.pdf]

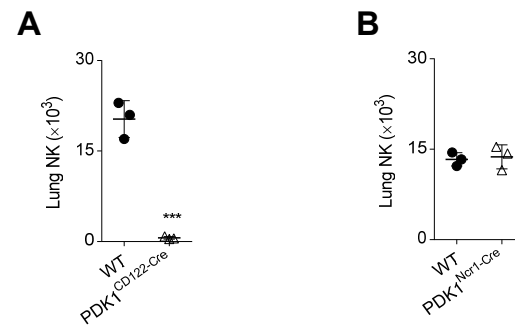

**Supplemental Fig. 1. CD122-Cre mediated PDK1 deletion impairs NK cell-mediated immunosurveillance in vivo.**

(A) The number of NK cells were counted in the metastatic melanoma lesion of WT and PDK1<sup>CD122-Cre</sup> mice. (B) The number of NK cells were counted in the metastatic melanoma lesion of WT and PDK1<sup>Ncr1-Cre</sup> mice.

**A**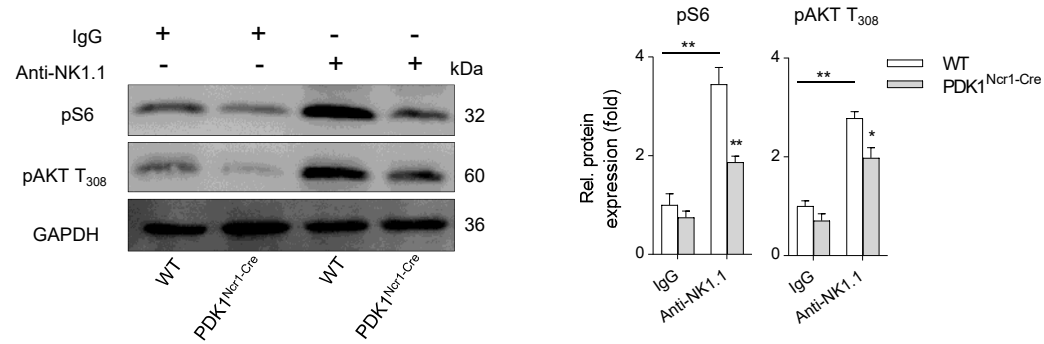**B**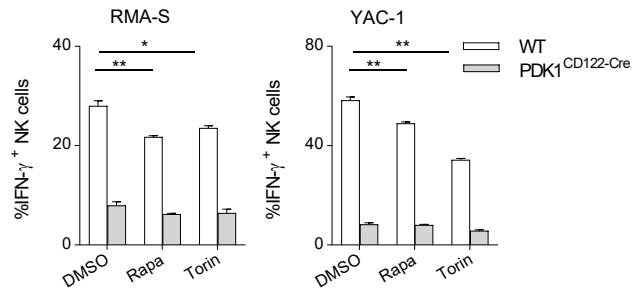**C**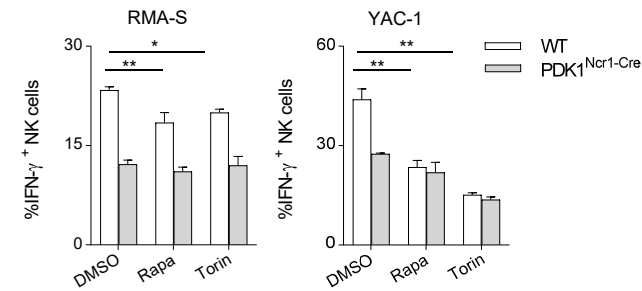

**Supplemental Figure 2. PDK1-mTOR signaling plays an important role in NK cell IFN- $\gamma$  production.** (A) The phosphorylation level of S6 and AKT T<sub>308</sub> with antibodies against NK1.1 stimulation were evaluated by western blotting in NK cells. (B-C) NK cells were prepared from poly (I:C)-treated PDK1<sup>CD122-cre</sup> mice (B) or PDK1<sup>Ncr1-cre</sup> mice (C) and pretreated with PI3K-mTOR signaling inhibitors. Then, the cells were cultured with an equal number of tumor cells for 4 hours in the presence of a Golgi blocker; intracellular staining was performed to assess the production of IFN- $\gamma$ . The data represent the mean  $\pm$  s.d and are representative of three independent experiments.
